# Supplementary material
Source: ML conference proceedings conference paper supplement (https://openreview.net/forum?id=MCC3MG2aRH)
Supplement: supplementary_material [file README.pdf › ManipBench-Supp/README.pdf]

# File Structure in Supplementary Folder

---

## 1. ManipBench-Real-World-Exp.mp4

---

This video demonstrates several real-world experiments we conducted to evaluate the effectiveness of our benchmark.

## 2. ManipBench-Full-Paper.pdf

---

Since the Appendix contains citations, we are including the full PDF to ensure the references remain accurate. We recommend that reviewers refer to the original submission for the first eight pages—the “main paper.”
